# Supplementary material for: Network Analysis Reveals Species-Specific Organization of Microbial Communities in Four Co-Occurring Elasmobranch Species along the Georgia Coast
Source: MDPI journal article supplement (doi:10.3390/fishes9010034), 2024-01-15
Supplement: s1 [file s1]

## Supplemental information

Table S1. Stable isotope values for  $\delta^{15}\text{N}$  and  $\delta^{13}\text{C}$  of white muscle taken from the four target species. ND = no data available.

| Sample ID                 | Date    | Sex | Disk Width (cm) | Total Mass (g) | $\delta^{15}\text{N}$ | $\delta^{13}\text{C}$ |
|---------------------------|---------|-----|-----------------|----------------|-----------------------|-----------------------|
| <i>Atlantic Stingray</i>  |         |     |                 |                |                       |                       |
| DS20190823-001            | 8/23/19 | M   | 13              | 66             | 12.06                 | -15.87                |
| DS20190627-002            | 6/27/19 | M   | 21              | 245            | 12.35                 | -16.57                |
| DS20190812-002            | 8/12/19 | M   | 20.3            | 313            | 12.53                 | -16.71                |
| DS20190627-001            | 6/27/19 | M   | 17              | 175            | 12.58                 | -16.47                |
| DS20190812-003            | 8/12/19 | M   | 21              | 313            | 12.68                 | -16.41                |
| DS20190823-002            | 8/23/19 | M   | 17.5            | 200            | 12.72                 | -16.66                |
| DS20190812-001            | 8/12/19 | F   | 12              | 54             | 13.05                 | -16.43                |
| <i>Bluntnose stingray</i> |         |     |                 |                |                       |                       |
| HS20190617-002            | 6/17/19 | F   | 23.6            | 374            | 11.59                 | -17.75                |
| HS20190812-001            | 8/12/19 | M   | 15.2            | 595            | 11.61                 | -16.97                |
| HS20190617-001            | 6/17/19 | M   | 22.1            | 396            | 11.82                 | -17.29                |
| HS20190624-001            | 6/24/19 | M   | 25              | 615            | 12.16                 | -17.29                |
| HS20190812-002            | 8/12/19 | F   | 19.5            | 300            | 12.27                 | -17.14                |
| HS20190624-002            | 6/24/19 | M   | 25.8            | 565            | 12.42                 | -17.27                |
| HS20190823-001            | 8/23/19 | M   | 18.7            | 205            | 12.43                 | -16.78                |
| HS20190627-002            | 6/27/19 | F   | 27              | 595            | 12.70                 | -17.35                |
| HS20190702-005            | 7/2/19  | M   | 16.1            | 180            | 13.71                 | -17.31                |
| HS20190702-002            | 7/2/19  | F   | 24.2            | 510            | 13.87                 | -16.38                |
| HS20190702-004            | 7/2/19  | M   | 16.1            | 130            | 14.02                 | -16.67                |
| HS20190702-003            | 7/2/19  | F   | 18.4            | 220            | 14.71                 | -16.34                |
| <i>Butterfly ray</i>      |         |     |                 |                |                       |                       |
| GM20190607-001            | 6/7/19  | F   | 50              | 1306           | 13.51                 | -16.19                |
| GM20190823-002            | 8/23/19 | F   | 36.5            | 385            | 13.94                 | -16.78                |
| GM20190702-005            | 7/2/19  | F   | 33.7            | 315            | 14.02                 | -17.28                |
| GM20190702-001            | 7/2/19  | M   | 20.5            | 330            | 14.02                 | -17.23                |
| GM20190627-002            | 6/27/19 | M   | 33.3            | 335            | 14.03                 | -15.88                |
| GM20190812-002            | 8/12/19 | F   | 38.5            | 505            | 14.11                 | -17.01                |
| GM20190617-002            | 6/17/19 | M   | 33              | 359            | 14.14                 | -16.60                |
| GM20190702-006            | 7/2/19  | M   | 31.9            | 305            | 14.21                 | -16.16                |
| GM20190702-007            | 7/2/19  | M   | 28.7            | 170            | 14.28                 | -16.84                |
| GM20190617-003            | 6/17/19 | M   | 33              | 359            | 14.31                 | -16.20                |
| GM20190823-001            | 8/23/19 | M   | 29.8            | 277            | 14.32                 | -16.05                |
| GM20190812-001            | 8/12/19 | M   | 34              | 370            | 14.37                 | -15.89                |
| GM20190812-003            | 8/12/19 | M   | 35              | 426            | 14.40                 | -16.27                |
| GM20190624-001            | 6/24/19 | F   | 24.8            | 75             | 14.41                 | -16.46                |
| <i>Sharpnose</i>          |         |     |                 |                |                       |                       |
| RT20190812-001            | 8/12/19 | ND  | ND              | ND             | 14.49                 | -16.81                |

|                |         |    |      |     |       |        |
|----------------|---------|----|------|-----|-------|--------|
| RT20190812-011 | 8/12/19 | F  | 31.6 | 298 | 14.99 | -16.55 |
| RT20190812-002 | 8/12/19 | ND | ND   | ND  | 15.00 | -16.99 |
| RT20190617-001 | 6/17/19 | ND | ND   | ND  | 15.66 | -16.39 |
| RT20190617-002 | 6/17/19 | F  | 29.7 | 203 | 16.38 | -16.95 |

Table S2. Top ten keystone phyla organized alphabetically for internal and external networks by species. Betweenness centrality value is reported along with rank (1 = highest rank, 10 = lowest rank). Phyla that were shared within species between internal and external networks are shown in red.

|                    | Internal              |                        |      | External           |                        |      |
|--------------------|-----------------------|------------------------|------|--------------------|------------------------|------|
|                    | Phyla                 | Betweenness Centrality | Rank | Phyla              | Betweenness Centrality | Rank |
| Atlantic Stingray  |                       |                        |      |                    |                        |      |
|                    | Acidobacteria         | 174.61811              | 2    | Acidobacteria      | 403.233333             | 3    |
|                    | Bacteroidetes         | 87.881746              | 5    | AncK6              | 317.733333             | 7    |
|                    | Chloroflexi           | 78.870491              | 7    | Bacteroidetes      | 281.533333             | 9    |
|                    | Elusimicrobia         | 56.728644              | 8    | Chloroflexi        | 391.466667             | 4    |
|                    | Gemmatimonadetes      | 80.22381               | 6    | Elusimicrobia      | 388.066667             | 5    |
|                    | Hydrogenedentes       | 51.514286              | 10   | Epsilonbacteraeota | 538.133333             | 2    |
|                    | Omnitrophicaeota      | 109.903175             | 4    | Gemmatimonadetes   | 271.533333             | 10   |
|                    | Patescibacteria       | 52.192857              | 9    | Latescibacteria    | 292.866667             | 8    |
|                    | Planctomycetes        | 192.25                 | 1    | Modulibacteria     | 338.633333             | 6    |
|                    | Poribacteria          | 119.038889             | 3    | Verrucomicrobia    | 557.2                  | 1    |
| Bluntnose stingray |                       |                        |      |                    |                        |      |
|                    | Bacteroidetes         | 130.497164             | 5    | Actinobacteria     | 381.166667             | 1    |
|                    | BRC1                  | 93.666667              | 8    | AncK6              | 144.333333             | 6    |
|                    | Fibrobacteres         | 69.984616              | 10   | Armatimonadetes    | 176.333333             | 5    |
|                    | Gemmatimonadetes      | 117.364726             | 7    | Hydrogenedentes    | 372                    | 2    |
|                    | Lentisphaerae         | 245.020496             | 2    | Latescibacteria    | 100                    | 9    |
|                    | Modulibacteria        | 307.6                  | 1    | Omnitrophicaeota   | 270                    | 4    |
|                    | Patescibacteria       | 93.666667              | 9    | Patescibacteria    | 364.333333             | 3    |
|                    | PAUC34f               | 128.403846             | 6    | Planctomycetes     | 140.166667             | 7    |
|                    | Planctomycetes        | 156.417356             | 4    | Tenericutes        | 133.166667             | 8    |
|                    | Zixibacteria          | 241.991537             | 3    | Zixibacteria       | 100                    | 10   |
| Butterfly Ray      |                       |                        |      |                    |                        |      |
|                    | Bacteroidetes         | 108                    | 4    | Acidobacteria      | 294.769048             | 2    |
|                    | Chloroflexi           | 6                      | 10   | Epsilonbacteraeota | 174                    | 8    |
|                    | Epsilonbacteraeota    | 44                     | 6    | Fibrobacteres      | 174.333333             | 7    |
|                    | Gemmatimonadetes      | 182                    | 3    | Firmicutes         | 175.885714             | 6    |
|                    | Kiritimatiellaeota    | 44                     | 7    | Gemmatimonadetes   | 167.985714             | 9    |
|                    | Latescibacteria       | 60.2                   | 5    | Kiritimatiellaeota | 187.238095             | 5    |
|                    | Lentisphaerae         | 218.25                 | 2    | Latescibacteria    | 278.561905             | 3    |
|                    | Nitrospirae           | 23.45                  | 9    | Nitrospirae        | 122                    | 10   |
|                    | Verrucomicrobia       | 267.45                 | 1    | Patescibacteria    | 278                    | 4    |
|                    | Zixibacteria          | 43                     | 8    | Proteobacteria     | 530                    | 1    |
| Sharpnose          |                       |                        |      |                    |                        |      |
|                    | Acidobacteria         | 43.161474              | 7    | Acidobacteria      | 149.370778             | 4    |
|                    | Bacteria unclassified | 87.413373              | 2    | Actinobacteria     | 238.75643              | 1    |
|                    | Bacteroidetes         | 78.562412              | 4    | Calditrichaeota    | 97.430574              | 10   |
|                    | Chlamydiae            | 30.095681              | 9    | Chlamydiae         | 200.714097             | 2    |
|                    | Chloroflexi           | 27.967674              | 10   | Fibrobacteres      | 99.621585              | 9    |
|                    | Lentisphaerae         | 107.677692             | 1    | Gemmatimonadetes   | 109.449903             | 8    |

|  |                 |           |   |                    |            |   |
|--|-----------------|-----------|---|--------------------|------------|---|
|  | Modulibacteria  | 31.310176 | 8 | Hydrogenedentes    | 146.944795 | 5 |
|  | Planctomycetes  | 56.203027 | 5 | Kiritimatiellaeota | 132.182291 | 6 |
|  | Spirochaetes    | 86.569319 | 3 | Planctomycetes     | 162.157859 | 3 |
|  | Verrucomicrobia | 47.920492 | 6 | Proteobacteria     | 125.14496  | 7 |

Table S3. Top ten phyla that were most integral to the network organized alphabetically for internal and external networks by species. Closeness centrality value is reported along with rank (1 = highest rank, 10 = lowest rank). Phyla that were shared within species between internal and external networks are shown in red.

|                    | Internal            |                      |      | External              |                      |      |
|--------------------|---------------------|----------------------|------|-----------------------|----------------------|------|
|                    | Phyla               | Closeness Centrality | Rank | Phyla                 | Closeness Centrality | Rank |
| Atlantic Stingray  |                     |                      |      |                       |                      |      |
|                    | Acidobacteria       | 0.673077             | 3    | Acidobacteria         | 0.341463             | 5    |
|                    | Calditrichaeota     | 0.614035             | 8    | AncK6                 | 0.3                  | 10   |
|                    | Cyanobacteria       | 0.666667             | 4    | Chloroflexi           | 0.318182             | 6    |
|                    | Elusimicrobia       | 0.614035             | 6    | Elusimicrobia         | 0.318182             | 7    |
|                    | Firmicutes          | 1                    | 1    | Enttheonellaeota      | 1                    | 1    |
|                    | Gemmatimonadetes    | 0.603448             | 10   | Epsilonbacteraeota    | 0.358974             | 3    |
|                    | Lentisphaerae       | 0.614035             | 7    | Kiritimatiellaeota    | 0.306569             | 9    |
|                    | Omnitrophicaeota    | 0.614035             | 5    | Latescibacteria       | 0.347107             | 4    |
|                    | Tenericutes         | 1                    | 2    | Tenericutes           | 0.318182             | 8    |
|                    | WS2                 | 0.614035             | 9    | Verrucomicrobia       | 0.375                | 2    |
| Bluntnose stingray |                     |                      |      |                       |                      |      |
|                    | Actinobacteria      | 1                    | 2    | Unclassified Bacteria | 1                    | 2    |
|                    | Aquificae           | 1                    | 1    | Bacteroidetes         | 1                    | 1    |
|                    | Deinococcus-Thermus | 0.666667             | 4    | Calditrichaeota       | 1                    | 5    |
|                    | Gemmatimonadetes    | 0.546875             | 7    | Chlamydiae            | 1                    | 3    |
|                    | Latescibacteria     | 0.530303             | 8    | Dependentiae          | 0.8                  | 8    |
|                    | Lentisphaerae       | 0.564516             | 6    | Elusimicrobia         | 0.8                  | 9    |
|                    | Planctomycetes      | 0.522388             | 9    | Epsilonbacteraeota    | 1                    | 4    |
|                    | Tenericutes         | 0.666667             | 3    | LCP-89                | 0.666667             | 10   |
|                    | WPS-2               | 0.6                  | 5    | Schekmanbacteria      | 0.833333             | 7    |
|                    | Zixibacteria        | 0.514706             | 10   | Spirochaetes          | 1                    | 6    |
| Butterfly Ray      |                     |                      |      |                       |                      |      |
|                    | Acidobacteria       | 0.571429             | 9    | Acetothermia          | 1                    | 2    |
|                    | Actinobacteria      | 1                    | 2    | Armatimonadetes       | 1                    | 4    |
|                    | Calditrichaeota     | 1                    | 4    | Cloacimonetes         | 1                    | 3    |
|                    | Chloroflexi         | 1                    | 1    | Dadabacteria          | 0.6                  | 10   |
|                    | Cyanobacteria       | 0.8                  | 6    | Deinococcus-Thermus   | 0.666667             | 9    |
|                    | Dadabacteria        | 0.8                  | 7    | Elusimicrobia         | 1                    | 5    |
|                    | Dependentiae        | 1                    | 5    | Hydrogenedentes       | 1                    | 6    |
|                    | Planctomycetes      | 0.8                  | 8    | Spirochaetes          | 1                    | 7    |
|                    | Synergistetes       | 1                    | 3    | Thermotogae           | 1                    | 1    |

|           |                  |          |    |                    |          |    |
|-----------|------------------|----------|----|--------------------|----------|----|
|           | Verrucomicrobia  | 0.547619 | 10 | WS2                | 0.666667 | 8  |
| Sharpnose |                  |          |    |                    |          |    |
|           | Acidobacteria    | 0.787234 | 6  | Acidobacteria      | 0.625    | 2  |
|           | Bacteroidetes    | 0.822222 | 4  | Chlamydiae         | 0.584416 | 8  |
|           | BRC1             | 1        | 1  | Fibrobacteres      | 0.608108 | 6  |
|           | Chloroflexi      | 0.770833 | 8  | Gemmatimonadetes   | 0.616438 | 4  |
|           | Lentisphaerae    | 0.755102 | 9  | Kiritimatiellaeota | 0.6      | 7  |
|           | Modulibacteria   | 0.787234 | 7  | Lentisphaerae      | 0.576923 | 9  |
|           | Nitrospinae      | 1        | 2  | Planctomycetes     | 0.661765 | 1  |
|           | Omnitrophicaeota | 1        | 3  | Proteobacteria     | 0.56962  | 10 |
|           | Planctomycetes   | 0.804348 | 5  | Verrucomicrobia    | 0.616438 | 5  |
|           | Verrucomicrobia  | 0.755102 | 10 | WPS-2              | 0.621622 | 3  |

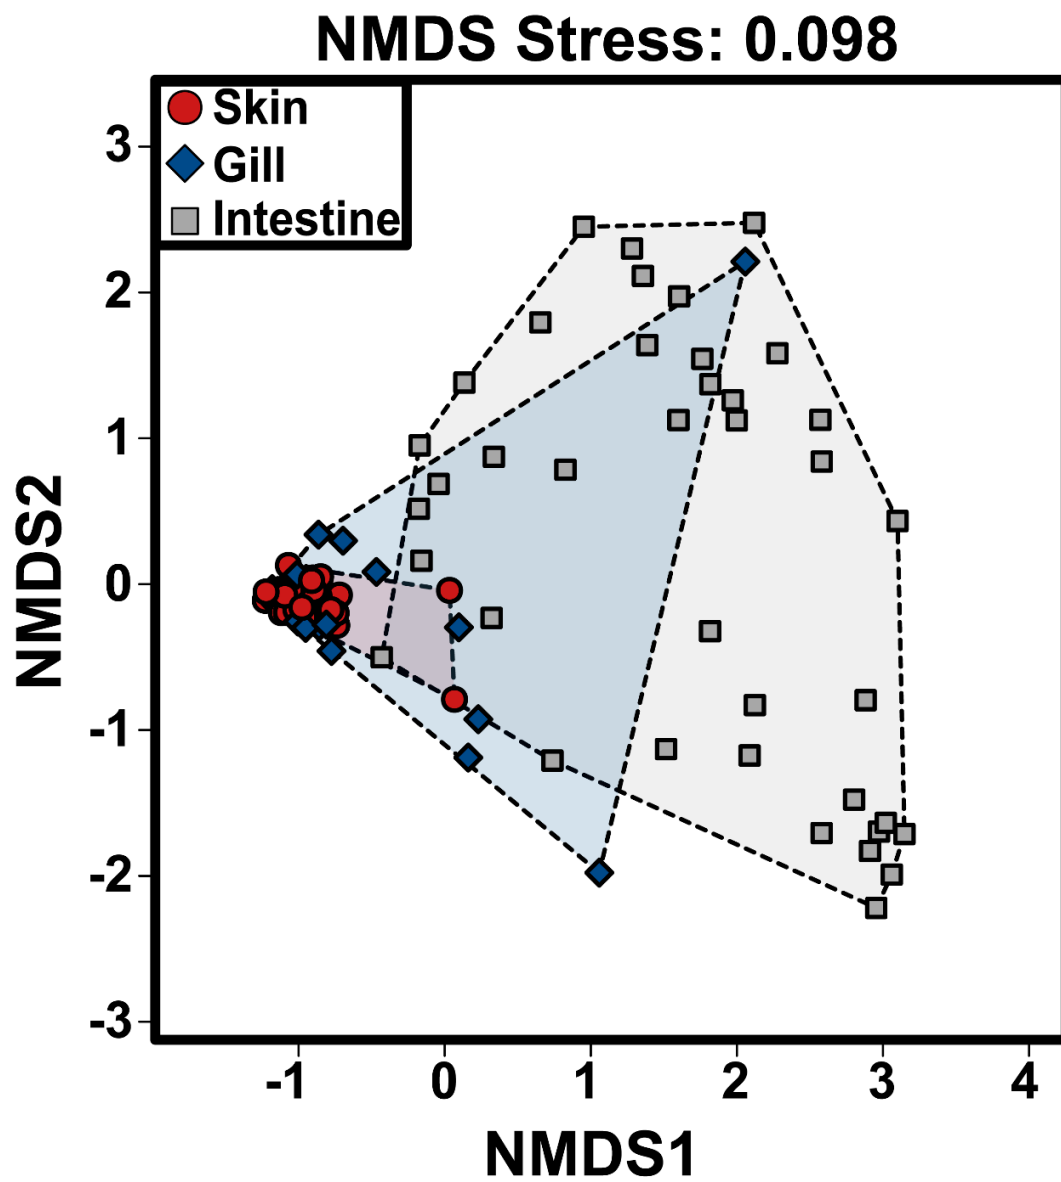

Figure S1. NMDS analysis plot of ASV based Bray-Curtis distances depicting bacterial beta diversity of skin, gill and intestinal samples of 4 different host species (Atlantic stingray, Bluntnose stingray, Butterfly ray, and Sharpnose).

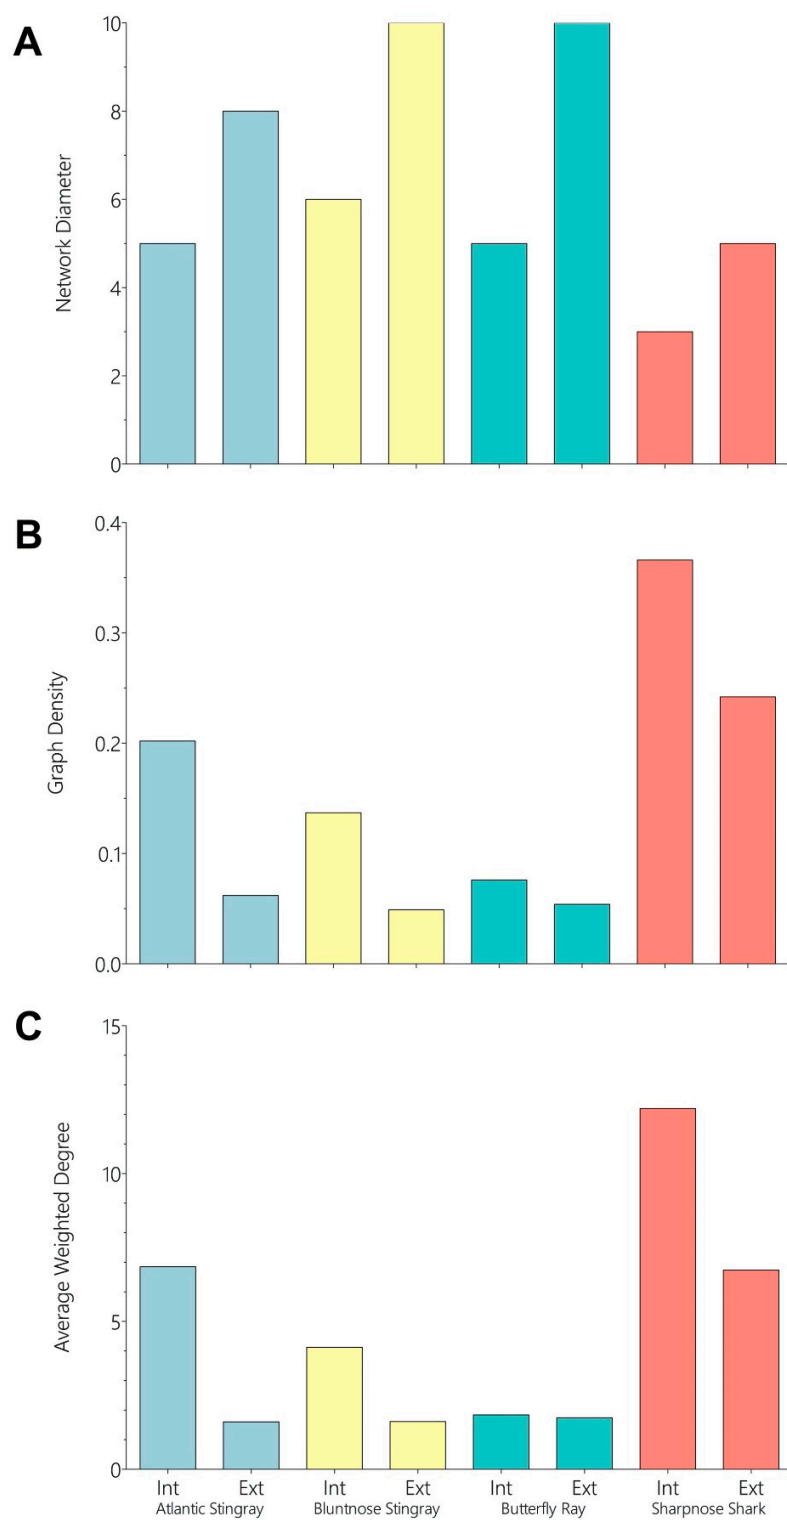

Figure S2. Comparative metrics for internal (“Int”) and external (“Ext”) networks for four species of elasmobranchs. A) Network diameter is a measure of network size, that accounts for the spread of both number of nodes and edges. B) Graph density is a measure of the tightness of the network by size. C) Average weighted degree is the mean number of edges radiating out from any given node in an undirected network.
